# Supplementary material for: Obtaining extremely large and accurate protein multiple sequence alignments from curated hierarchical alignments
Source: Database (Oxford). 2020 Jun 8;2020:baaa042. doi: 10.1093/database/baaa042 (PMC7297217; doi:10.1093/database/baaa042)
Supplement: neuwald_DataS1_baaa042 [file neuwald_datas1_baaa042.xlsx]

## Sheet: PFAM_EEP
pdbid	chn(s)	Score	BiU	L	D	X	d.1	R	F
1ako	A	87.48	1.73	22401	201	1572	124	201	6.141
3fzi	A	73.32	0.55	21977	243	1520	124	243	6.307
4jg3	A	68.05	0.62	18957	202	1372	111	202	5.991
3l1w	F	68.04	0.29	20542	218	1068	103	218	4.469
3mpr	A	61.24	0.42	23706	240	1241	102	240	4.596
5dfh	B	58	1.56	17264	197	1237	100	197	5.07
4ruw	A	57.62	0.99	21183	200	1430	99	200	5.437
6fk4	A	55.48	0.54	20740	199	1820	107	199	7.49
4b5j	A	54.94	0.04	20353	197	824	81	197	3.405
4z0v	A	54.63	0.14	24595	207	1159	87	207	3.838
5cfe	A	53.56	1.01	20336	171	1134	83	171	4.745
1de9	B	47.9	0.03	19562	193	1548	95	193	6.344
5ino	A	43.41	0.49	19155	181	826	70	181	3.53
4puq	A	43.07	0.72	16011	208	675	73	208	2.909
2dds	A	38.17	0.41	17080	156	985	68	156	3.956
4f1h	B	36.23	0.4	16375	191	854	70	191	3.65
4f1i	A	33.47	0.98	17063	216	1269	82	216	6.16
3teb	B	32.9	0.32	15979	174	1012	69	174	4.306
3i5v	C	23.51	0.28	16003	150	1111	57	150	4.873
3nr8	B	21.42	0.2	12983	129	593	43	129	2.045

## Sheet: CDD_EEP
pdbid	chn(s)	Score	BiU	L	D	X	d.1	R	F
3fzi	A	216.3	1.07	22632	289	900	203	289	3.719
6fk4	A	193.53	1.19	22847	247	908	179	247	3.721
5dfh	B	190.86	0.49	20166	254	745	176	254	3.041
4b5j	A	190.68	0.47	22632	265	488	156	265	2.008
1ako	A	190.39	0.72	22864	261	899	181	261	3.512
3mpr	A	186.75	0.12	22252	267	339	141	267	1.251
5cfe	A	185.34	0.24	21797	239	1093	183	239	4.554
4jg3	A	176.61	0.1	22632	263	1334	194	263	5.49
1de9	B	173.29	0.39	22644	248	700	158	248	2.857
3l1w	F	172.54	0.47	21598	261	967	177	261	4.046
4z0v	A	141.5	0.3	22032	257	1823	188	257	6.056
4f1i	A	140.55	1.68	20181	259	412	125	259	1.784
2dds	A	140.37	1.4	23770	275	644	139	275	2.268
4puq	A	139.53	0.3	20584	266	531	135	266	2.279
4f1h	B	125.08	2.81	20589	253	551	124	253	2.345
5ino	A	117.18	1.03	20387	209	410	104	209	1.745
3i5v	C	114.62	0.35	22899	270	643	124	270	2.355
3nr8	B	111.7	0.07	19999	235	748	126	235	2.579
3teb	B	102.83	0.92	22022	236	473	102	236	1.884
4ruw	A	81.73	0.7	19871	221	505	91	221	1.92

## Sheet: EEP
pdbid	chn(s)	PFAM	CDD	average
3nr8	B	21.42	111.7	66.56
3teb	B	32.9	102.83	67.865			# seqs	columns	ave. RE (nats)	seq ID	MinMatch	Selection	Total M75U98
3i5v	C	23.51	114.62	69.065		CDD	26827	233	0.54	98	0.75	random	108153
4ruw	A	57.62	81.73	69.675		PFAM	26827	233	0.56	98	0.75	All	26827
5ino	A	43.41	117.18	80.295
4f1h	B	36.23	125.08	80.655
4f1i	A	33.47	140.55	87.01
2dds	A	38.17	140.37	89.27
4puq	A	43.07	139.53	91.3
4z0v	A	54.63	141.5	98.065
1de9	B	47.9	173.29	110.595
5cfe	A	53.56	185.34	119.45
3l1w	F	68.04	172.54	120.29
4jg3	A	68.05	176.61	122.33
4b5j	A	54.94	190.68	122.81
3mpr	A	61.24	186.75	123.995
5dfh	B	58	190.86	124.43
6fk4	A	55.48	193.53	124.505
1ako	A	87.48	190.39	138.935
3fzi	A	73.32	216.3	144.81

## Sheet: PFAM_PH
pdbid	chn(s)	Score	BiU	L	D	X	d.1	R	F
1fao	A	65.4	1.61	3174	94	111	59	94	1.261
5mr1	A	61.62	1.7	3114	85	96	53	85	1.043
5jjd	A	59.83	0.37	2947	80	122	56	80	1.402
5he3	A	59.75	1.1	3022	92	114	57	92	1.31
3pp2	A	59.45	1.92	3284	101	95	54	101	0.872
1u2b	A	59.33	0.31	3279	84	104	53	84	0.945
1v89	A	58.12	1.42	3515	79	72	45	79	0.735
2yry	A	57.89	0.03	3345	72	100	49	72	1.087
4a5k	A	56.38	2.32	3456	86	72	45	86	0.679
6bbq	A	55.45	0.67	3274	84	98	50	84	0.899
2dn6	A	55.38	0.27	3254	72	93	47	72	1.045
1upq	A	55.17	0.11	3345	83	100	50	83	1.087
1u27	A	54.83	0.39	3279	80	98	49	80	0.891
1rj2	A	53.58	0.33	2745	74	139	54	74	1.287
2dtc	A	53.11	1.71	3129	82	89	47	82	0.848
6c2y	A	52.89	0.71	3022	73	112	49	73	1.287
3a8p	A	52.35	0.3	2537	71	76	45	71	0.71
2mdx	A	49.76	0.45	2952	80	162	55	80	1.841
6fsf	A	49.51	0.38	2523	71	98	47	71	0.98
4ckg	A	49.04	0.07	3100	75	79	43	75	0.898
2dkp	A	48.56	0.89	3345	74	97	44	74	1.054
3hw2	B	48.25	0.33	3354	80	95	45	80	1
1wg7	A	47.82	0.71	3134	91	114	50	91	1.14
4y94	B	47.73	0.03	2896	78	110	48	78	0.894
2pz1	A	46.56	0.2	3528	75	123	46	75	1.23
5c79	A	46.41	0.44	2940	65	86	41	65	1.012
4kvg	B	46.19	0.34	3536	87	84	43	87	0.824
1u5g	A	45.74	0.87	3359	76	83	41	76	0.865
2da0	A	45.69	0.59	2940	65	68	38	65	0.8
4gn1	A	45.63	0.03	3536	80	73	40	80	0.716
1x1f	A	45.53	2.09	2873	71	78	40	71	0.907
2d9x	A	45.49	0.47	2885	65	114	44	65	1.281
1b55	A	44.6	0.14	3377	93	139	51	93	1.13
3mpx	A	44.55	0.86	2713	65	75	39	65	0.862
1v5u	A	43.27	0.45	3359	70	84	39	70	0.866
1p6s	A	43.22	0.91	3198	68	71	37	68	0.74
2p0d	A	42.41	2.51	2895	78	76	39	78	0.717
5u77	A	42.39	0.38	3045	84	73	40	84	0.664
2lul	A	42.21	0.27	3368	86	71	39	86	0.71
6dlu	B	41.72	0.9	3441	53	71	33	53	0.717
2cod	A	41.64	0.9	2869	54	104	38	54	1.224
3ky9	A	41.25	1.72	2949	76	74	38	76	0.779
2ys1	A	40.17	0.22	3441	69	100	39	69	1.01
5a3f	A	39.02	0.31	3119	71	95	39	71	0.96
3aj4	A	38.96	0.24	3360	99	83	41	99	0.83
1v5m	A	37.64	0.87	2606	61	91	37	61	1
2vrw	B	37.51	1.87	2877	82	111	42	82	1.168
4h6y	A	36.61	0.23	2292	56	77	35	56	0.856
4k2p	A	36.03	0.55	2894	61	106	37	61	1.093
4h6y	A	35.58	0.58	2715	50	79	32	50	0.878
4f7h	A	34.48	0.39	2381	62	135	41	62	1.57
3fm8	C	33.64	1.18	2315	75	81	37	75	0.835
4gzu	A	33.42	0.93	2570	61	103	36	61	1.144
1qqg	A	32.13	0.69	2253	62	96	36	62	1.067
5l81	A	31.69	0.75	2308	60	115	37	60	1.438
2dhi	A	31.32	0.17	3360	76	72	32	76	0.72
4xh9	A	29.89	1.24	2128	67	89	35	67	0.899
5kcv	A	29.68	0.21	2810	55	125	34	55	1.302
4bbk	A	28.99	0.3	2308	62	148	39	62	1.741
2d9z	A	28.58	0.16	3552	51	90	28	51	0.826
6bnm	A	27.11	0.25	3285	74	95	32	74	0.872
1dro	A	26.05	0.11	3213	70	48	25	70	0.457
1pms	A	24.16	0.17	2245	47	55	24	47	0.55
1wi1	A	23.99	0.18	3284	68	94	29	68	0.979
5c5b	B	23.43	0.11	3039	76	80	29	76	0.879
2dhk	A	22.49	0.44	3035	69	160	34	69	1.778
1v61	A	22.49	0.71	2173	48	54	23	48	0.692
2coa	A	22.47	1.19	1919	31	35	18	31	0.473
4mt7	A	21.51	0.17	2457	47	74	24	47	0.86
2ys3	A	20.59	0.71	2379	44	89	24	44	1.06
2d9v	A	19.95	0.01	3450	67	134	29	67	1.34
5c5b	A	17.32	0.26	2519	70	145	31	70	1.629
2d9w	A	16.67	1.57	3299	59	113	23	59	1.097
3ksy	A	16.54	1.04	2245	35	113	21	35	1.13
6bca	A	12.83	0	2745	81	105	25	81	1.082
1foe	A	1.09	0.15	2475	52	289	15	52	2.726

## Sheet: CDD_PH
pdbid	chn(s)	Score	BiU	L	D	X	d.1	R	F
5he3	A	71.92	0.41	3245	94	127	65	94	1.46
1fao	A	69.51	0.48	3326	98	118	63	98	1.341
3aj4	A	67.24	0.29	3433	100	146	66	100	1.46
1u27	A	64.99	0.06	3428	86	112	57	86	1.018
1wg7	A	64.9	0.06	3360	102	134	64	102	1.34
4f7h	A	64.32	0.05	3441	92	186	67	92	1.918
5l81	A	64.31	0.1	3441	92	106	57	92	1.093
1x1f	A	62.9	0.89	3331	79	96	52	79	1.079
6bbq	A	62.44	0.37	3423	89	132	59	89	1.211
3a8p	A	62.42	1.38	3346	86	261	70	86	2.439
3hw2	B	62.08	0.02	3431	81	124	56	81	1.305
1u2b	A	61.92	1	3428	90	106	55	90	0.964
1v89	A	61.13	0.19	3435	82	104	53	82	1.061
5jjd	A	61.13	0.04	3093	82	149	60	82	1.713
1v5m	A	59.14	0.56	3450	89	286	71	89	2.698
2vrw	B	59.09	0.94	2947	83	129	57	83	1.358
6bca	A	58.94	0.46	3175	74	98	50	74	1.032
3pp2	A	57.14	0.92	3363	103	117	57	103	1.073
6bnm	A	57.01	0.16	3108	83	102	52	83	0.936
1rj2	A	56.99	0.53	3261	80	128	54	80	1.174
3ky9	A	56.73	0.08	2801	77	127	55	77	1.337
5u77	A	56.56	0.45	3341	84	124	54	84	1.127
2pz1	A	56.55	0.33	3279	76	139	54	76	1.39
1qqg	A	56.32	0.81	3033	83	127	55	83	1.323
6c2y	A	56.25	0.99	3245	75	102	49	75	1.172
2dtc	A	55.93	0.14	3351	82	157	57	82	1.51
4a5k	A	55.89	0.24	3530	91	152	58	91	1.434
2dhk	A	55.79	0.65	3183	75	101	49	75	1.122
2dkp	A	55.62	0.42	3262	76	134	53	76	1.473
5c79	A	55.2	0.17	3086	68	131	51	68	1.541
1p6s	A	55.15	2.35	3350	72	130	50	72	1.354
2dhi	A	54.47	0.02	3433	77	184	57	77	1.84
2yry	A	54.09	1.06	3262	69	134	50	69	1.473
1upq	A	54.04	0.03	3343	85	140	55	85	1.522
4ckg	A	53.77	0.06	3250	78	103	49	78	1.17
4k2p	A	53.57	0.45	3356	84	138	54	84	1.29
5c5b	B	53.45	0.09	3415	89	155	57	89	1.703
2p0d	A	52.38	0.54	3180	91	133	55	91	1.255
1b55	A	52.38	0.25	3372	95	131	55	95	1.065
1v5u	A	52.08	0.81	3350	77	126	50	77	1.299
4y94	B	52.07	0.23	2962	81	137	54	81	1.114
4bbk	A	51.77	0.41	3107	92	131	55	92	1.351
4xh9	A	51.17	0.73	3117	91	94	49	91	0.87
2d9x	A	51	1.88	3024	67	237	56	67	2.693
4kvg	B	50.77	0.34	3446	91	149	55	91	1.461
5a3f	A	50.69	0.48	3269	75	143	51	75	1.444
2mdx	A	50.48	0.25	3172	83	253	63	83	2.875
2dn6	A	50.44	0.45	3331	74	255	59	74	2.865
1u5g	A	50.07	0.2	3354	87	139	53	87	1.448
6fsf	A	49.95	0.73	2865	75	108	48	75	1.08
3fm8	C	49.79	1.81	2645	78	151	54	78	1.557
2lul	A	49.57	0.22	3360	82	109	48	82	1.09
1v61	A	48.88	1.35	3340	68	138	47	68	1.5
4gn1	A	48.66	0.1	3446	83	139	51	83	1.363
2d9w	A	48.07	1.2	3293	69	127	46	69	1.233
2da0	A	47.45	0.65	3086	69	103	44	69	1.212
2ys1	A	47.22	0.43	3441	74	130	47	74	1.313
5mr1	A	46.72	1.01	3264	86	161	53	86	1.75
3mpx	A	46.34	0.09	2713	65	131	47	65	1.506
5c5b	A	45.46	0.05	3240	84	112	47	84	1.231
4mt7	A	45.12	0.29	3279	67	144	46	67	1.44
1foe	A	44.09	0.92	3457	79	238	55	79	1.951
6dlu	B	43.58	0.06	3441	55	125	40	55	1.263
2cod	A	43.06	0.66	3013	59	233	49	59	2.741
2ys3	A	42	0.18	3441	64	156	44	64	1.608
2d9v	A	41.99	0.15	3433	62	137	42	62	1.37
4h6y	A	41.49	1.02	2642	54	120	40	54	1.333
4gzu	A	41.06	0.8	2502	57	73	36	57	0.811
2coa	A	37.96	0.82	3356	72	127	41	72	1.21
1dro	A	37.95	0.56	3356	67	79	35	67	0.752
2d9z	A	37.87	0.78	3357	65	187	44	65	1.716
5kcv	A	36.06	0.15	3174	62	132	39	62	1.375
1pms	A	35.78	0.24	3023	61	73	33	61	0.76
1wi1	A	35.47	0.6	3274	76	120	40	76	1.25
4h6y	A	35.01	0.49	2228	53	109	37	53	1.211
3ksy	A	31.51	0.36	3023	51	244	40	51	2.542

## Sheet: CDD_PH_hiRE
pdbid	chn(s)	Score	BiU	L	D	X	d.1	R	F
1fao	A	76.17	0.72	3326	98	100	63	98	1.136
3aj4	A	75.46	2.08	3433	100	111	64	100	1.11
1v5m	A	64.99	0.43	3450	89	116	58	89	1.094
5he3	A	64.28	1.35	3245	94	103	57	94	1.184
1u2b	A	63.57	0.64	3428	90	106	56	90	0.964
1v89	A	63.16	2.23	3435	82	104	53	82	1.061
4a5k	A	62.94	0.98	3530	91	117	57	91	1.104
1u27	A	62.83	0.21	3428	86	106	55	86	0.964
3hw2	B	62.67	0.4	3431	81	108	54	81	1.137
5mr1	A	61.9	2.18	3264	86	112	55	86	1.217
3a8p	A	61.52	0.36	3346	86	109	55	86	1.019
1wg7	A	60.88	0.36	3360	102	116	59	102	1.16
3ky9	A	60.77	0.63	2801	77	93	52	77	0.979
6bbq	A	60.17	0.26	3423	89	104	54	89	0.954
1qqg	A	59.96	0.61	3033	83	127	57	83	1.323
1upq	A	59.55	0.22	3343	85	103	53	85	1.12
2yry	A	59.41	0.25	3262	69	99	49	69	1.088
4ckg	A	58.15	0.11	3250	78	95	50	78	1.08
4f7h	A	58.11	0.44	3441	92	108	54	92	1.113
5l81	A	57.31	0.99	3441	92	106	53	92	1.093
5jjd	A	57.26	0.27	3093	82	96	51	82	1.103
2dkp	A	57.09	0.69	3262	76	104	50	76	1.143
3pp2	A	56.11	1.65	3363	103	218	68	103	2
1u5g	A	55.79	0.53	3354	87	115	53	87	1.198
1x1f	A	55.37	1.12	3331	79	197	59	79	2.213
1b55	A	54.88	0.16	3372	95	113	54	95	0.919
2pz1	A	54.78	0.29	3279	76	104	49	76	1.04
2dhi	A	54.49	0	3433	77	106	49	77	1.06
2vrw	B	54.32	1.65	2947	83	99	50	83	1.042
6bnm	A	54.3	0.21	3108	83	98	50	83	0.899
2p0d	A	54.27	0.29	3180	91	195	63	91	1.84
2dhk	A	54.24	0.24	3183	75	195	58	75	2.167
2dn6	A	53.51	0.1	3331	74	151	53	74	1.697
1v5u	A	53.39	0.85	3350	77	148	53	77	1.526
2d9x	A	52.88	0.02	3024	67	143	51	67	1.625
5u77	A	52.71	0.29	3341	84	101	49	84	0.918
4k2p	A	52.62	2.32	3356	84	207	59	84	1.935
2dtc	A	52.48	0.81	3351	82	107	49	82	1.029
6c2y	A	52.12	0.21	3245	75	143	52	75	1.644
6bca	A	51.63	0.76	3175	74	96	46	74	1.011
2lul	A	51.5	0.3	3360	82	117	50	82	1.17
1rj2	A	51.42	0.67	3261	80	104	48	80	0.954
6fsf	A	50.4	1.41	2865	75	117	49	75	1.17
2mdx	A	49.85	0.28	3172	83	95	47	83	1.08
4y94	B	49.79	0.31	2962	81	100	48	81	0.813
4kvg	B	49.75	0.5	3446	91	106	49	91	1.039
4gn1	A	48.37	0.01	3446	83	106	47	83	1.039
5c79	A	48.32	0.09	3086	68	91	43	68	1.071
1v61	A	48.13	0.94	3340	68	101	43	68	1.098
4bbk	A	48.04	0.13	3107	92	95	48	92	0.979
3fm8	C	46.73	1.76	2645	78	92	45	78	0.948
2cod	A	46.51	0.69	3013	59	91	40	59	1.071
5c5b	B	44.65	0.04	3415	89	105	46	89	1.154
2da0	A	44.43	0.55	3086	69	91	41	69	1.071
5a3f	A	44.37	0.25	3269	75	109	44	75	1.101
2ys1	A	43.86	0.05	3441	74	108	43	74	1.091
4xh9	A	43.62	1.43	3117	91	98	45	91	0.907
2d9v	A	42.62	0.32	3433	62	134	42	62	1.34
5c5b	A	41.52	0.75	3240	84	58	36	84	0.637
1p6s	A	41.49	2.24	3350	72	105	40	72	1.094
3mpx	A	39.95	0.55	2713	65	163	46	65	1.874
2coa	A	39.61	2.29	3356	72	106	39	72	1.01
2d9w	A	39.59	1.35	3293	69	105	39	69	1.019
4mt7	A	39.57	0.46	3279	67	104	39	67	1.04
4gzu	A	36.83	1.9	2502	57	87	35	57	0.967
6dlu	B	36.52	0.7	3441	55	101	34	55	1.02
2d9z	A	35.95	0.39	3357	65	110	37	65	1.009
1foe	A	35.62	0.32	3457	79	226	49	79	1.852
1dro	A	35.51	0.07	3356	67	117	38	67	1.114
1wi1	A	35.39	0.1	3274	76	138	42	76	1.438
4h6y	A	35.29	0.58	2642	54	89	34	54	0.989
1pms	A	34.95	0.38	3023	61	95	35	61	0.99
4h6y	A	34.48	0.71	2228	53	125	38	53	1.389
5kcv	A	30.07	0.81	3174	62	78	30	62	0.812
2ys3	A	29.27	0.35	3441	64	235	41	64	2.423
3ksy	A	21.84	0.34	3023	51	229	33	51	2.385

## Sheet: PH
pdbid	chain	PFAM	CDD-random	CDD hiRE	average
1foe	A	1.09	44.09	35.62	20.4725
3ksy	A	16.54	31.51	21.84	21.6075
2ys3	A	20.59	42	29.27	28.1125
1wi1	A	23.99	35.47	35.39	29.71
1pms	A	24.16	35.78	34.95	29.7625
2d9w	A	16.67	48.07	39.59	30.25
5c5b	A	17.32	45.46	41.52	30.405
2coa	A	22.47	37.96	39.61	30.6275
2d9v	A	19.95	41.99	42.62	31.1275
5kcv	A	29.68	36.06	30.07	31.3725
1dro	A	26.05	37.95	35.51	31.39
4mt7	A	21.51	45.12	39.57	31.9275
2d9z	A	28.58	37.87	35.95	32.745
6bca	A	12.83	58.94	51.63	34.0575
4h6y	A1	35.58	35.01	35.29	35.365
1v61	A	22.49	48.88	48.13	35.4975
4gzu	A	33.42	41.06	36.83	36.1825
5c5b	B	23.43	53.45	44.65	36.24
4h6y	A2	36.61	41.49	34.48	37.2975
4xh9	A	29.89	51.17	43.62	38.6425
2dhk	A	22.49	55.79	54.24	38.7525
4bbk	A	28.99	51.77	48.04	39.4475
6dlu	B	41.72	43.58	36.52	40.885
3fm8	C	33.64	49.79	46.73	40.95
6bnm	A	27.11	57.01	54.3	41.3825
2ys1	A	40.17	47.22	43.86	42.855
2dhi	A	31.32	54.47	54.49	42.9
2cod	A	41.64	43.06	46.51	43.2125
5a3f	A	39.02	50.69	44.37	43.275
3mpx	A	44.55	46.34	39.95	43.8475
4k2p	A	36.03	53.57	52.62	44.5625
1qqg	A	32.13	56.32	59.96	45.135
1p6s	A	43.22	55.15	41.49	45.77
2da0	A	45.69	47.45	44.43	45.815
5l81	A	31.69	64.31	57.31	46.25
2lul	A	42.21	49.57	51.5	46.3725
4gn1	A	45.63	48.66	48.37	47.0725
2vrw	B	37.51	59.09	54.32	47.1075
4f7h	A	34.48	64.32	58.11	47.8475
2p0d	A	42.41	52.38	54.27	47.8675
1v5u	A	43.27	52.08	53.39	48.0025
4kvg	B	46.19	50.77	49.75	48.225
5u77	A	42.39	56.56	52.71	48.5125
2d9x	A	45.49	51	52.88	48.715
5c79	A	46.41	55.2	48.32	49.085
1b55	A	44.6	52.38	54.88	49.115
4y94	B	47.73	52.07	49.79	49.33
1u5g	A	45.74	50.07	55.79	49.335
6fsf	A	49.51	49.95	50.4	49.8425
1v5m	A	37.64	59.14	64.99	49.8525
2mdx	A	49.76	50.48	49.85	49.9625
3ky9	A	41.25	56.73	60.77	50
2pz1	A	46.56	56.55	54.78	51.1125
1x1f	A	45.53	62.9	55.37	52.3325
2dkp	A	48.56	55.62	57.09	52.4575
4ckg	A	49.04	53.77	58.15	52.5
6c2y	A	52.89	56.25	52.12	53.5375
2dtc	A	53.11	55.93	52.48	53.6575
2dn6	A	55.38	50.44	53.51	53.6775
1rj2	A	53.58	56.99	51.42	53.8925
3aj4	A	38.96	67.24	75.46	55.155
3hw2	B	48.25	62.08	62.67	55.3125
1wg7	A	47.82	64.9	60.88	55.355
1upq	A	55.17	54.04	59.55	55.9825
3a8p	A	52.35	62.42	61.52	57.16
2yry	A	57.89	54.09	59.41	57.32
4a5k	A	56.38	55.89	62.94	57.8975
5mr1	A	61.62	46.72	61.9	57.965
3pp2	A	59.45	57.14	56.11	58.0375
6bbq	A	55.45	62.44	60.17	58.3775
1u27	A	54.83	64.99	62.83	59.37
5jjd	A	59.83	61.13	57.26	59.5125
1v89	A	58.12	61.13	63.16	60.1325
1u2b	A	59.33	61.92	63.57	61.0375
5he3	A	59.75	71.92	64.28	63.925
1fao	A	65.4	69.51	76.17	69.12
