# Supplementary material for: Obtaining extremely large and accurate protein multiple sequence alignments from curated hierarchical alignments
Source: Database (Oxford). 2020 Jun 8;2020:baaa042. doi: 10.1093/database/baaa042 (PMC7297217; doi:10.1093/database/baaa042)
Supplement: neuwald_TableS1_baaa042 [file neuwald_tables1_baaa042.xlsx]

## Sheet: CDD hiMSAs
CD identifier	length	subgroups	superfamily name	# aligned seqs
cd15901	163	10	EFh_DMD_DYTN_DTN	1108
cd10319	177	17	EphR_LBD	1471
cd07827	174	12	RHD-n	1516
cd00252	107	12	EFh_SPARC_EC	1772
cd04515	213	13	Alpha_kinase	1773
cd07347	78	10	harmonin_N_like	1923
cd08524	144	20	Reelin_subrepeat_like	2143
cd11684	392	16	DHR2_DOCK	2559
cd08824	70	16	LOTUS	2666
cd00089	68	22	HR1	2793
cd16101	88	11	ING	3146
cd14945	288	12	Myo5-like_CBD	3419
cd04748	87	11	Commd	3491
cd12930	81	12	GAT_SF	3780
cd00213	88	10	S-100	3959
cd09034	345	12	BRO1_Alix_like	4329
cd16100	87	23	ARID	4467
cd03523	105	13	NTR_like	5040
cd07066	119	31	CRD_FZ	5210
cd04519	256	26	RasGAP	5327
cd03587	41	31	SOCS	5345
cd07323	75	12	LAM	5484
cd00139	253	13	PIPKc	5707
cd14447	143	12	SPX	6318
cd04371	81	17	DEP	6430
cd05162	87	10	PWWP	6657
cd06916	72	37	NR_DBD_like	6747
cd05467	96	14	CBM20	6988
cd11746	179	11	GH94N_like	7093
cd09295	392	46	Sema	7109
cd16364	118	23	T3SC_I_like	7399
cd04370	123	16	BAH	7749
cd12120	95	11	AMPKA_C_like	8197
cd00121	126	15	MATH	8286
cd07954	245	20	AP_MHD_Cterm	8406
cd00185	87	36	TNFRSF	9086
cd08148	366	10	RuBisCO_large	9091
cd05396	370	12	An_peroxidase_like	9113
cd05992	81	17	PB1	9449
cd00145	323	10	POLBc	9811
cd06157	168	39	NR_LBD	10091
cd07440	113	52	RGS	10094
cd06169	62	16	BMC	10100
cd08204	106	33	ArfGap	10180
cd08774	225	10	14-3-3	10443
cd02249	46	13	ZZ	10790
cd00241	158	16	DOMON_like	10880
cd00316	399	16	Oxidoreductase_nitrogenase	11040
cd02325	59	14	R3H	11950
cd03559	116	18	LGIC_TM	12030
cd03127	90	18	tetraspanin_LEL	12183
cd00326	227	13	alpha_CA	12696
cd14733	55	93	BACK	12848
cd00113	116	11	PLAT	13572
cd15898	137	25	EFh_PI-PLC	13953
cd00024	50	65	CD_CSD	15168
cd10148	80	12	CsoR-like_DUF156	16013
cd00197	115	48	VHS_ENTH_ANTH	16212
cd03558	179	63	LGIC_ECD	16240
cd00599	186	13	GH25_muramidase	17365
cd00313	65	14	ATP-synt_Fo_Vo_Ao_c	17539
cd00172	364	18	SERPIN	17546
cd00065	52	67	FYVE_like_SF	17738
cd06093	106	67	PX_domain	18198
cd08304	69	81	DD	18426
cd00460	86	10	RNAP_RPB11_RPB3	18557
cd07374	174	11	CYTH-like_Pase	19590
cd00102	89	11	IPT	20142
cd00173	79	113	SH2	20523
cd00194	28	158	UBA_like_SF	21510
cd00193	54	57	SNARE	21558
cd00688	300	10	ISOPREN_C2_like	21629
cd08000	99	11	NGN	21853
cd17706	311	10	MCM	22068
cd09487	56	121	SAM_superfamily	22117
cd00013	97	15	ADF_gelsolin	22329
cd14818	117	21	longin-like	22433
cd00159	169	39	RhoGAP	22559
cd02749	147	11	Macro	23392
cd02259	122	10	Peptidase_C39_like	23588
cd02257	255	19	Peptidase_C19	23836
cd04369	99	37	Bromodomain	23867
cd14686	52	43	bZIP	23928
cd07320	260	19	Extradiol_Dioxygenase_3B_like	24317
cd14814	111	11	Peptidase_M15	24813
cd00286	332	11	Tubulin_FtsZ_Cetz-like	25536
cd00080	71	13	H3TH_StructSpec-5'-nucleases	26217
cd06099	213	19	CS_ACL-C_CCL	26475
cd03493	98	13	SQR_QFR_TM	26739
cd02795	124	14	CBM6-CBM35-CBM36_like	26834
cd08773	117	13	FpgNei_N	26993
cd07307	194	101	BAR	28951
cd00600	63	29	Sm_like	29028
cd11744	286	18	MIT_CorA-like	29032
cd03333	209	13	chaperonin_like	29696
cd08368	53	162	LIM	29697
cd00413	210	12	Glyco_hydrolase_16	30594
cd10785	203	38	GH38-57_N_LamB_YdjC_SF	30638
cd11709	118	76	SPRY	32923
cd07767	116	19	MPN	33231
cd01513	102	11	Translation_factor_III	33495
cd15897	165	21	EFh_PEF	33930
cd16387	54	27	ParB_N_Srx	34729
cd06846	182	14	Adenylation_DNA_ligase_like	34866
cd01067	125	53	Globin_like	35830
cd00650	263	17	LDH_MDH_like	36181
cd00538	126	25	PA	36966
cd14790	253	18	GH_D	37645
cd01363	170	83	Motor_domain	37698
cd00203	167	18	ZnMc	38285
cd09299	326	10	TDT	38454
cd00329	107	10	TopoII_MutL_Trans	38999
cd00168	128	14	CAP	39367
cd00598	210	18	GH18_chitinase-like	40822
cd11358	218	12	RNase_PH	44926
cd00027	68	58	BRCT	45355
cd01060	122	11	Membrane-FADS-like	45774
cd00596	216	60	Peptidase_M14_like	46516
cd02106	110	21	SPFH_like	48174
cd02688	82	17	E_set	48566
cd01819	155	36	Patatin_and_cPLA2	48984
cd09593	125	10	UDG_like	49062
cd11523	72	22	NTP-PPase	49489
cd00174	51	330	SH3	49590
cd02775	101	21	MopB_CT	50506
cd00037	116	17	CLECT	51066
cd00380	49	17	KOW	52067
cd05819	269	14	NHL	52334
cd01901	164	29	Ntn_hydrolase	52894
cd01483	143	13	E1_enzyme_family	53383
cd05470	109	27	pepsin_retropepsin_like	53577
cd03084	355	12	phosphohexomutase	55878
cd00719	69	26	GIY-YIG_SF	56024
cd07766	271	43	DHQ_Fe-ADH	56234
cd15489	48	221	PHD_SF	57346
cd00368	374	26	Molybdopterin-Binding	57704
cd09005	216	16	NP-I	58047
cd01594	231	12	Lyase_I_like	58433
cd03174	265	12	DRE_TIM_metallolyase	58672
cd09987	217	36	Arginase_HDAC	58907
cd04410	136	27	DMSOR_beta-like	59345
cd08369	173	14	FMT_core	61308
cd08772	257	64	GH43_62_32_68_117_130	62505
cd07309	88	13	PHP	63309
cd16961	178	77	RMtype1_S_TRD-CR_like	64052
cd01165	79	242	BTB_POZ	64388
cd00442	61	34	Lyz_like	64569
cd14494	113	172	PTP_DSP_cys	65114
cd00394	161	12	Clp_protease_like	65581
cd08555	179	74	PI-PLCc_GDPD_SF	65599
cd00298	80	30	ACD_sHsps_p23-like	66847
cd01636	184	12	FIG	67866
cd00317	146	10	cyclophilin	68432
cd00448	107	10	YjgF_YER057c_UK114_family	69342
cd01610	122	19	PAP2_like	70775
cd13956	271	12	PT_UbiA	70805
cd00308	229	18	enolase_like	73673
cd05843	94	23	Peptidase_M48_M56	74274
cd00657	130	24	Ferritin_like	74472
cd02062	122	17	Nitro_FMN_reductase	74566
cd00030	102	107	C2	75051
cd09594	105	27	GluZincin	76196
cd09815	224	12	TP_methylase	81380
cd00396	222	11	PurM-like	82709
cd02115	248	29	AAK	85083
cd00352	220	10	Gn_AT_II	85216
cd00188	83	14	TOPRIM	85320
cd03467	98	29	Rieske	87552
cd10585	142	63	CE4_SF	89631
cd07197	253	25	nitrilase	89898
cd00636	148	19	TroA-like	91342
cd00306	241	36	Peptidases_S8_S53	97237
cd07375	117	10	Anticodon_Ia_like	102232
cd00551	260	44	AmyAc_family	102312
cd06808	211	31	PLPDE_III	103863
cd06222	121	18	RNase_H_like	104967
cd00138	119	105	PLDc_SF	107118
cd00198	161	34	vWFA	107522
cd08372	241	35	EEP	107738
cd00229	187	30	SGNH_hydrolase	111585
cd00900	89	335	PH-like	111988
cd06125	96	35	DnaQ_like_exo	114830
cd00945	201	18	Aldolase_Class_I	115030
cd00299	100	59	GST_C_family	117764
cd04761	49	40	HTH_MerR-SF	118177
cd04795	87	15	SIS	119142
cd06551	187	12	LPLAT	119276
cd03524	75	26	RPA2_OBF_family	119467
cd00995	466	33	PBP2_NikA_DppA_OppA_like	120850
cd07812	141	72	SRPBCC	121035
cd05191	86	14	NAD_bind_amino_acid_DH	122798
cd01291	87	26	PseudoU_synth	123812
cd09852	114	137	PIN_SF	124910
cd07060	99	31	SPOUT_MTase	127800
cd01342	80	26	Translation_Factor_II_like	130751
cd00012	185	58	NBD_sugar-kinase_HSP70_actin	132090
cd00322	223	40	FNR_like	132580
cd00920	110	138	Cupredoxin	135170
cd12154	310	47	FDH_GDH_like	136623
cd00196	68	315	Ubiquitin_like_fold	139068
cd00164	65	54	S1_like	146565
cd06534	367	77	ALDH-SF	152455
cd00158	89	26	RHOD	154753
cd00016	237	50	ALP_like	158248
cd02116	60	71	ACT	163871
cd00768	211	18	class_II_aaRS-like_core	164025
cd00208	78	26	LbetaH	165566
cd02019	69	17	NK	166920
cd00304	98	13	RT_like	169821
cd00287	196	22	ribokinase_pfkB_like	172288
cd03440	100	22	hot_dog	177145
cd01120	165	23	RecA-like_NTPases	184661
cd00568	168	25	TPP_enzymes	184698
cd00162	40	379	RING_Ubox	187972
cd00397	167	24	DNA_BRE_C	195693
cd14964	268	589	7tm_GPCRs	198634
cd02205	113	68	CBS_pair_SF	198795
cd03873	200	82	Zinc_peptidase_like	199251
cd00567	327	15	ACAD	199384
cd09300	59	28	DEAD-like_helicase_C	213250
cd02883	123	55	Nudix_Hydrolase	219204
cd07346	292	75	ABC_6TM_exporters	232042
cd00838	130	61	MPP_superfamily	236369
cd00327	254	12	cond_enzymes	237711
cd02156	105	34	nt_trans	238418
cd01292	275	34	metallo-dependent_hydrolases	245168
cd00590	72	563	RRM_SF	251723
cd01983	107	37	SIMIBI	254573
cd06587	112	72	VOC	257278
cd06262	188	86	metallo-hydrolase-like_MBL-fold	258503
cd12082	420	28	MATE_like	258794
cd05188	271	84	MDR	273543
cd03128	92	34	GAT_1	273655
cd06857	407	64	SLC5-6-like_sbd	286187
cd00096	70	184	Ig	289882
cd01984	86	22	AANH_like	294293
cd01391	269	142	Periplasmic_Binding_Protein_Type_1	301228
cd04433	336	85	AFD_class_I	375702
cd17912	81	169	DEAD-like_helicase_N	398175
cd04722	200	45	TIM_phosphate_binding	402247
cd05466	197	76	PBP2_LTTR_substrate	426097
cd01635	235	46	Glycosyltransferase_GTB-type	427353
cd00882	161	136	Ras_like_GTPase	429310
cd01427	97	106	HAD_like	431640
cd01659	69	143	TRX_superfamily	477617
cd00761	156	71	Glyco_tranf_GTA_type	559061
cd13968	136	586	PKc_like	573504
cd00648	242	282	Periplasmic_Binding_Protein_Type_2	597838
cd01494	170	16	AAT_I	673895
cd00075	102	45	HATPase	798012
cd02266	141	154	SDR	1115175
cd00267	91	108	ABC_ATP+D237:E253ase	1550319
average	156.992	50.0675		104016
median	124.5	23		51566.5
sum	39562	12617		26212066
